# Supplementary material
Source: Research Square preprint supplement (doi:10.21203/rs.3.rs-9203321/v1)
Supplement: Supplementary file 1 [file 87a3fe48d2d5a45b361ce9f5.docx]

**Table S1: Association between standardized log-transformed total testosterone [log(TT)] and coronary heart disease (CHD), stratified by sex and menopausal status**

| **Group** | **Exposure** | **Model 1 OR (95% CI)** | **P value (M1)** | **Model 2 OR (95% CI)** | **P value (M2)** | **Model 3 OR (95% CI)** | **P value (M3)** |
| --- | --- | --- | --- | --- | --- | --- | --- |
| **Men** | log(TT) per 1-SD | 0.71 (0.63–0.80) | <0.001 | 0.80 (0.71–0.92) | 0.001 | 0.85 (0.75–0.97) | **0.017** |
| **Women** | log(TT) per 1-SD | 0.76 (0.66–0.89) | <0.001 | 0.88 (0.77–1.01) | 0.064 | 0.92 (0.80–1.06) | 0.226 |
| **Premenopause** | log(TT) per 1-SD | 0.78 (0.56–1.07) | 0.123 | 0.84 (0.60–1.19) | 0.332 | 0.87 (0.60–1.27) | 0.479 |
| **Postmenopause** | log(TT) per 1-SD | 0.87 (0.73–1.04) | 0.123 | 0.88 (0.75–1.03) | 0.122 | 0.92 (0.78–1.08) | 0.288 |

Odds ratios (ORs) and 95% confidence intervals (CIs) were estimated using survey-weighted logistic regression models with multiple imputation. Log (TT) was standardized, and ORs are reported per 1-standard deviation (SD) increase.

Model 1 was adjusted for age.

.Model 2 was additionally adjusted for race/ethnicity, education level, marital status, poverty–income ratio (PIR), smoking status, and alcohol consumption.

Model 3 was further adjusted for diabetes, hypertension, and hyperlipidemia.

All analyses accounted for the complex NHANES sampling design, including sample weights, strata, and primary sampling units. Estimates were pooled using Rubin’s rules. All P values are two-sided.

**Table S2: Joint association of standardized log-transformed total testosterone [log(TT)] and testosterone-to-estradiol ratio [log(TT/E2)] with coronary heart disease (CHD) in men**

Survey-weighted logistic regression models accounting for the complex NHANES sampling design were fitted within each imputed dataset. The fully adjusted joint model simultaneously included standardized log (TT) and standardized log (TT/E2), along with age, race/ethnicity, education level, marital status, poverty–income ratio category, alcohol consumption, smoking status, diabetes, hypertension, and hyperlipidemia. Coronary heart disease was modeled as a binary outcome using a quasibinomial link function. Sampling weights, strata, and primary sampling units were incorporated using the survey design framework.

Estimates from each imputed dataset were combined using Rubin’s rules to obtain pooled regression coefficients, standard errors, odds ratios (ORs), and 95% confidence intervals (CIs). This joint modeling strategy allowed direct comparison of the independent contributions of testosterone and hormonal balance while accounting for their intrinsic correlation. The results were interpreted to determine whether either exposure provided incremental predictive value for CHD risk beyond the other in men.

| Exposure | OR | OR_low | OR_high | p_value |
| --- | --- | --- | --- | --- |
| log(TT) per 1-SD | 0.929792495 | 0.760388208 | 1.136937783 | 0.47809895 |
| log (TT/E2) per 1-SD | 0.857094161 | 0.68611477 | 1.070681514 | 0.17433852 |

Survey-weighted logistic regression models with multiple imputation were used to estimate odds ratios (ORs) and 95% confidence intervals (CIs). Both log(TT) and log(TT/E2) were standardized and simultaneously included in the fully adjusted model.

Models were adjusted for age, race/ethnicity, education level, marital status, poverty–income ratio (PIR), smoking status, alcohol consumption, diabetes, hypertension, and hyperlipidemia.

All analyses accounted for the complex NHANES sampling design. Estimates were pooled using Rubin’s rules. ORs are presented per 1-SD increase. All P values are two-sided.

**Table S3: Association between standardized log-transformed estradiol [log(E2)] and coronary heart disease (CHD), stratified by sex and menopausal status**

| **Group** | **Exposure** | **Model 1 OR (95% CI)** | **P value (M1)** | **Model 2 OR (95% CI)** | **P value (M2)** | **Model 3 OR (95% CI)** | **P value (M3)** |
| --- | --- | --- | --- | --- | --- | --- | --- |
| **Men** | log(E2) per 1-SD | 0.89 (0.73–1.09) | 0.254 | 0.98 (0.82–1.17) | 0.832 | 0.97 (0.81–1.16) | 0.756 |
| **Women** | log(E2) per 1-SD | 0.51 (0.44–0.58) | <0.001 | 0.84 (0.70–1.01) | 0.057 | 0.85 (0.71–1.02) | 0.076 |
| **Premenopause** | log(E2) per 1-SD | 1.07 (0.82–1.40) | 0.628 | 1.19 (0.92–1.53) | 0.189 | 1.26 (0.98–1.62) | 0.077 |
| **Postmenopause** | log(E2) per 1-SD | 0.70 (0.61–0.82) | <0.001 | 0.85 (0.72–1.01) | 0.072 | 0.83 (0.70–0.99) | **0.040** |

Odds ratios (ORs) and 95% confidence intervals (CIs) were estimated using survey-weighted logistic regression models with multiple imputation. Log(E2) was standardized, and ORs are reported per 1-standard deviation (SD) increase.

Model 1 was adjusted for age.

Model 2 was additionally adjusted for race/ethnicity, education level, marital status, poverty–income ratio (PIR), smoking status, and alcohol consumption.

Model 3 was further adjusted for diabetes, hypertension, and hyperlipidemia.

All analyses accounted for the complex NHANES sampling design. Estimates were pooled using Rubin’s rules. All P values are two-sided.


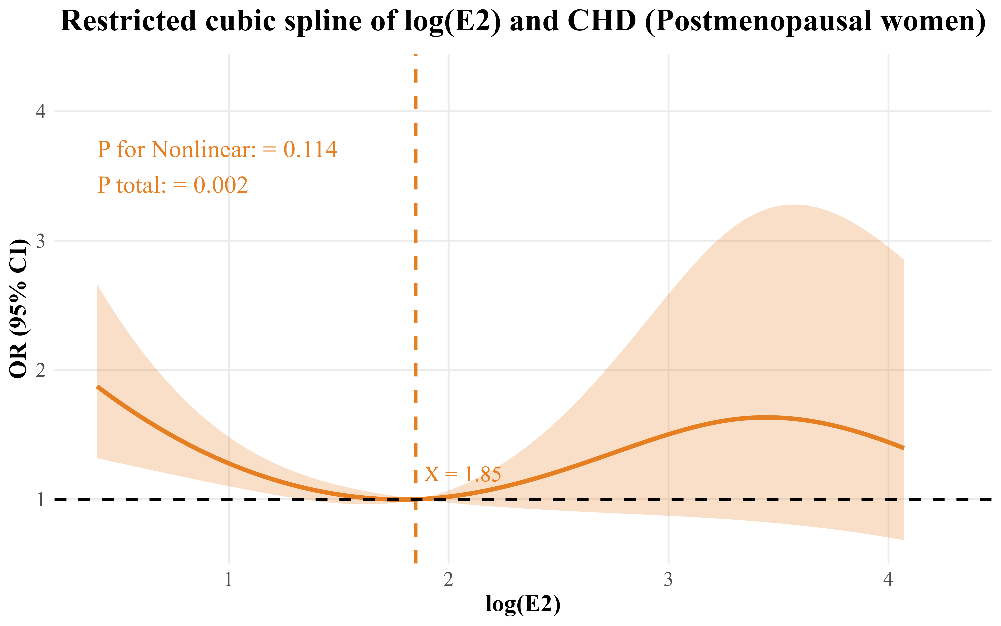


**Fig S1: Restricted Cubic Spline Analysis of log(E2) and CHD in Postmenopausal Women**

Survey-weighted restricted cubic spline depicting the association between log-transformed estradiol (log[E2]) and the odds of coronary heart disease (CHD) among postmenopausal women. The solid line represents the adjusted odds ratio, and the shaded area indicates the 95% confidence interval. The reference value was set at log(E2) = 1.85. P for overall association = 0.002; P for nonlinearity = 0.114.

**Table S4: Survey-weighted mediation analysis of the association between log-transformed testosterone-to-estradiol ratio [log(TT/E2)] and coronary heart disease (CHD) with weight-adjusted waist index (WWI) as a mediator among premenopausal women**

| **effect** | **estimate** | **se** | **CI_low** | **CI_high** | **p_value** | **p_formatted** |
| --- | --- | --- | --- | --- | --- | --- |
| **ACME (indirect)** | 0.000427 | 0.007045 | -0.01421 | 0.015938 | 0.951688 | 0.952 |
| **ADE (direct)** | -0.2725 | 0.114076 | -0.49918 | -0.05601 | 0.016904 | 0.017 |
| **Total effect** | -0.27056 | 0.116658 | -0.5012 | -0.04288 | 0.020382 | 0.02 |
| **Proportion mediated** | 0.010808 | 1.032331 | -0.08608 | 0.073202 | 0.991647 | 0.992 |

Mediation analysis was conducted within a survey-weighted multiple imputation framework. Exposure: log(TT/E2); mediator: weight-adjusted waist index (WWI); outcome: coronary heart disease (CHD).

ACME represents the average causal mediation effect (indirect effect), ADE represents the average direct effect, and total effect is the sum of ACME and ADE. The proportion mediated was calculated as ACME divided by the total effect.

Models were adjusted for age, race/ethnicity, education level, marital status, poverty–income ratio (PIR), smoking status, alcohol consumption, diabetes, hypertension, and hyperlipidemia.

Estimates were pooled using Rubin’s rules. Confidence intervals were obtained using simulation-based methods. All P values are two-sided.

**Table S5: Survey-weighted mediation analysis of the association between log-transformed estradiol [log(E2)] and coronary heart disease (CHD) with weight-adjusted waist index (WWI) as a mediator among postmenopausal women**

| **effect** | **estimate** | **se** | **CI_low** | **CI_high** | **p_value** | **p_formatted** |
| --- | --- | --- | --- | --- | --- | --- |
| **ACME (indirect)** | 0.023655782 | 0.010762563 | 0.005727 | 0.047174 | 0.027951 | 0.028 |
| **ADE (direct)** | -0.186972373 | 0.079116893 | -0.34418 | -0.03683 | 0.018116 | 0.018 |
| **Total effect** | -0.158079521 | 0.076942709 | -0.3102 | -0.00791 | 0.039926 | 0.04 |
| **Proportion mediated** | -4.144394874 | 261.9473852 | -0.98337 | -0.01089 | 0.987377 | 0.987 |

Mediation analysis was conducted within a survey-weighted multiple imputation framework. Exposure: log(E2); mediator: weight-adjusted waist index (WWI); outcome: coronary heart disease (CHD).

ACME represents the average causal mediation effect (indirect effect), ADE represents the average direct effect, and total effect is the sum of ACME and ADE. The proportion mediated was calculated as ACME divided by the total effect.

Models were adjusted for age, race/ethnicity, education level, marital status, poverty–income ratio (PIR), smoking status, alcohol consumption, diabetes, hypertension, and hyperlipidemia.

Estimates were pooled using Rubin’s rules. Confidence intervals were obtained using simulation-based methods. The proportion mediated should be interpreted with caution when the total effect is unstable. All P values are two-sided.

**Table S6. Sensitivity analyses for the association between log-transformed testosterone-to-estradiol ratio [log(TT/E2)] and coronary heart disease (CHD) across sex and menopausal subgroups**

| Analysis | Group | Exposure | OR (95% CI) | P value | N |
| --- | --- | --- | --- | --- | --- |
| Main analysis (MI + weighted) | Men | Log (TT/E2) per 1-SD | 0.81 (0.70–0.94) | 0.006 |  |
| Main analysis (MI + weighted) | Women | Log (TT/E2) per 1-SD | 1.08 (0.93–1.24) | 0.323 |  |
| Main analysis (MI + weighted) | Premenopause | Log (TT/E2) per 1-SD | 0.73 (0.56–0.95) | 0.020 |  |
| Main analysis (MI + weighted) | Postmenopause | Log (TT/E2) per 1-SD | 1.11 (0.95–1.29) | 0.200 |  |
| Complete-case weighted | Men | Log (TT/E2) per 1-SD | 0.86 (0.75–0.98) | 0.019 | 3507 |
| Complete-case weighted | Women | Log (TT/E2) per 1-SD | 1.13 (0.96–1.32) | 0.140 | 3633 |
| Complete-case weighted | Premenopause | Log (TT/E2) per 1-SD | 0.69 (0.49–0.97) | 0.031 | 1370 |
| Complete-case weighted | Postmenopause | Log (TT/E2) per 1-SD | 1.14 (0.96–1.35) | 0.123 | 2263 |
| Complete-case unweighted | Men | Log (TT/E2) per 1-SD | 0.85 (0.76–0.96) | 0.006 | 3507 |
| Complete-case unweighted | Women | Log (TT/E2) per 1-SD | 1.06 (0.87–1.28) | 0.575 | 3633 |
| Complete-case unweighted | Premenopause | Log (TT/E2) per 1-SD | 0.68 (0.46–1.02) | 0.060 | 1370 |
| Complete-case unweighted | Postmenopause | Log (TT/E2) per 1-SD | 1.13 (0.95–1.34) | 0.178 | 2263 |

Odds ratios (ORs) and 95% confidence intervals (CIs) are shown for the association between log (TT/E2) and CHD across men, women, premenopausal women, and postmenopausal women. The primary analysis was based on survey-weighted logistic regression with multiple imputation. Sensitivity analyses included complete-case weighted models and complete-case unweighted models. In all models, log (TT/E2) was standardized, and ORs are reported per 1-standard deviation (SD) increase. Fully adjusted models included age, race/ethnicity, education level, marital status, poverty–income ratio (PIR), smoking status, alcohol consumption, diabetes, hypertension, and hyperlipidemia. All P values are two-sided.


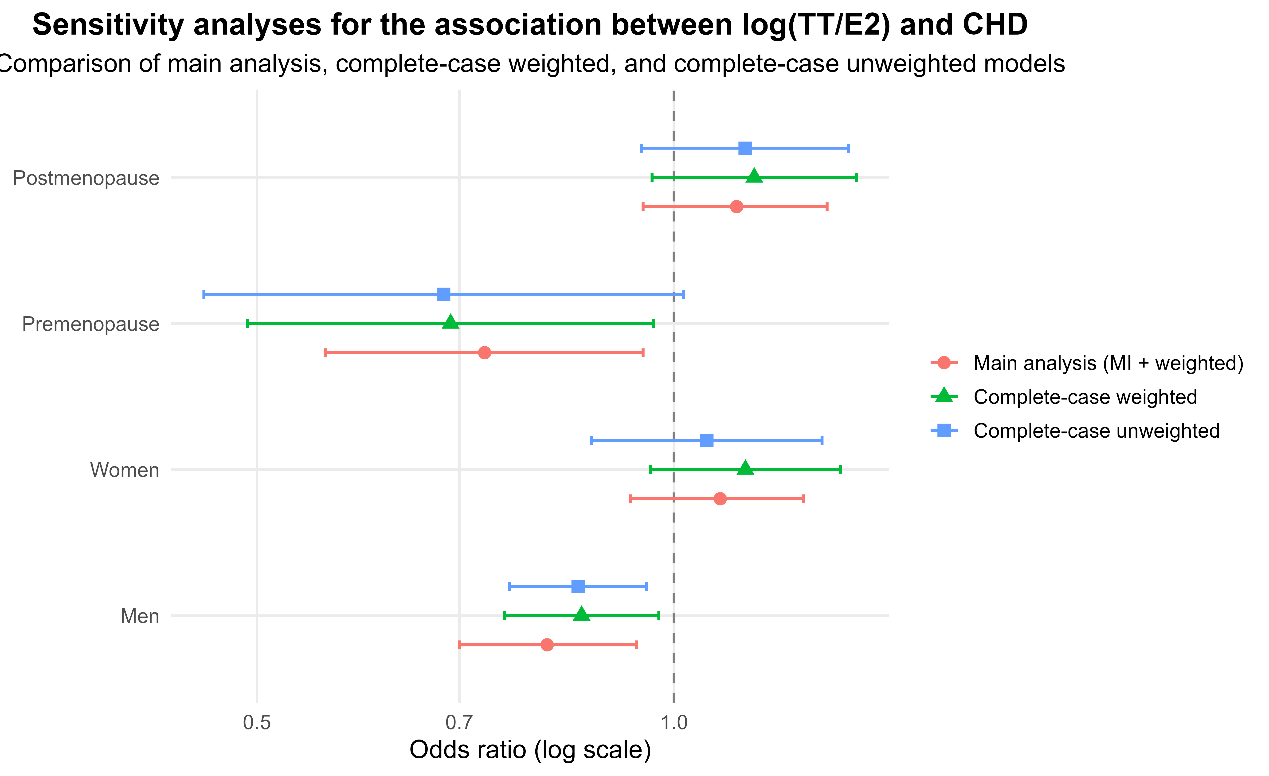


**Figure S2. Sensitivity analyses for the association between log(TT/E2) and CHD across sex and menopausal subgroups**

Forest plot comparing the effect estimates from the primary analysis (multiple imputation with survey weighting), complete-case weighted models, and complete-case unweighted models. Odds ratios (ORs) per 1-standard deviation (SD) increase in log (TT/E2) and 95% confidence intervals (CIs) are presented on a logarithmic scale for men, women, premenopausal women, and postmenopausal women. The vertical dashed line indicates OR = 1.0.

**Table S7. Sensitivity analyses for the interaction of log-transformed testosterone-to-estradiol ratio [log(TT/E2)] with sex and menopausal status in relation to coronary heart disease (CHD)**

| Analysis | Interaction | term | OR (95% CI) | P value |
| --- | --- | --- | --- | --- |
| Main analysis (MI + weighted) | log(TT/E2) × Gender | log(TT_E2):GenderWomen | 1.365 (1.058–1.760) | 0.017 |
| Complete-case weighted | log(TT/E2) × Gender | log(TT_E2):GenderWomen | 1.378 (1.047–1.814) | 0.022 |
| Main analysis (MI + weighted) | log(TT/E2) × Menopause status | log(TT_E2):menopause_statusYes | 1.424 (1.093–1.855) | 0.009 |
| Complete-case weighted | log(TT/E2) × Menopause status | log(TT_E2):menopause_statusYes | 1.497 (1.087–2.061) | 0.014 |

Interaction ORs and 95% confidence intervals (CIs) are shown for the interaction between log (TT/E2) and sex and for the interaction between log (TT/E2) and menopausal status. The primary analysis was based on survey-weighted logistic regression with multiple imputation. Sensitivity analyses were performed using complete-case weighted models. Fully adjusted models included age, race/ethnicity, education level, marital status, poverty–income ratio (PIR), smoking status, alcohol consumption, diabetes, hypertension, and hyperlipidemia. All P values are two-sided.


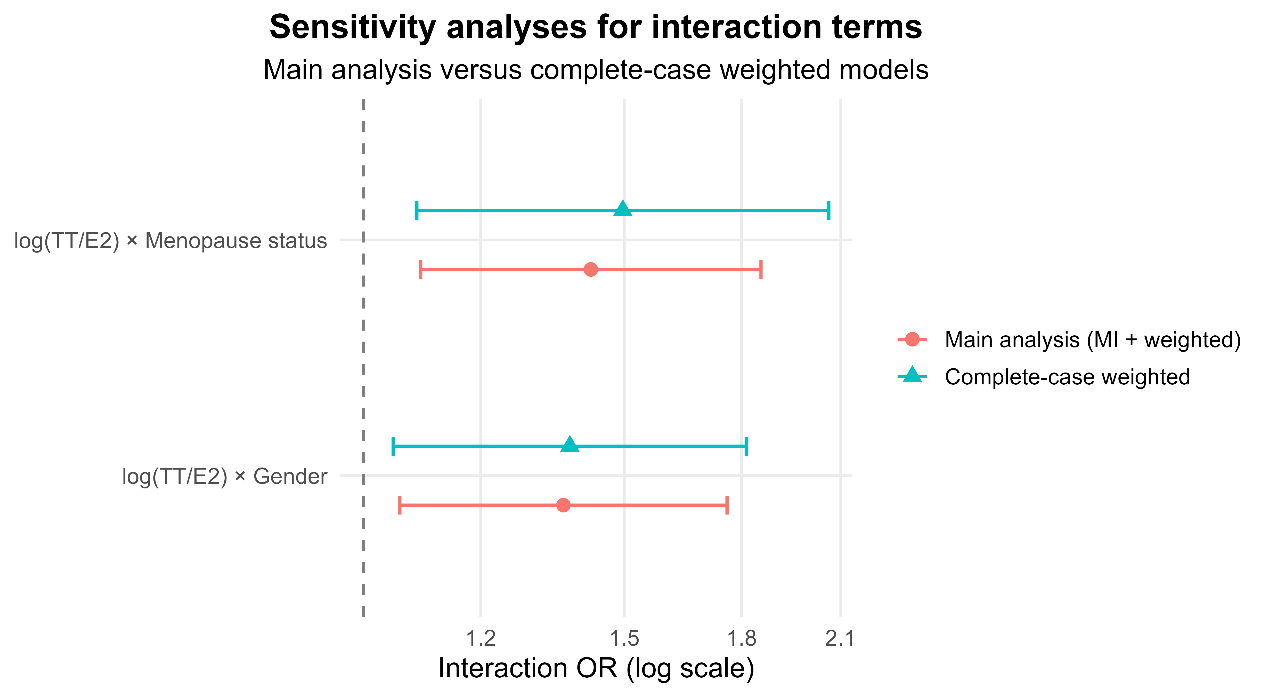


**Figure S3. Sensitivity analyses for interaction terms between log(TT/E2) and sex and between log(TT/E2) and menopausal status**

Forest plot comparing the interaction effect estimates from the primary analysis (multiple imputation with survey weighting) and complete-case weighted models. Interaction odds ratios (ORs) represent the multiplicative interaction effects between log (TT/E2) and sex or menopausal status. Estimates and 95% confidence intervals (CIs) are presented on a logarithmic scale. The vertical dashed line indicates OR = 1.0.
